# Supplementary material
Source: publisher figshare collection journal article supplement (https://sage.figshare.com/ndownloader/files/17906606)
Supplement: Supplementary file 1 [file 17906606]

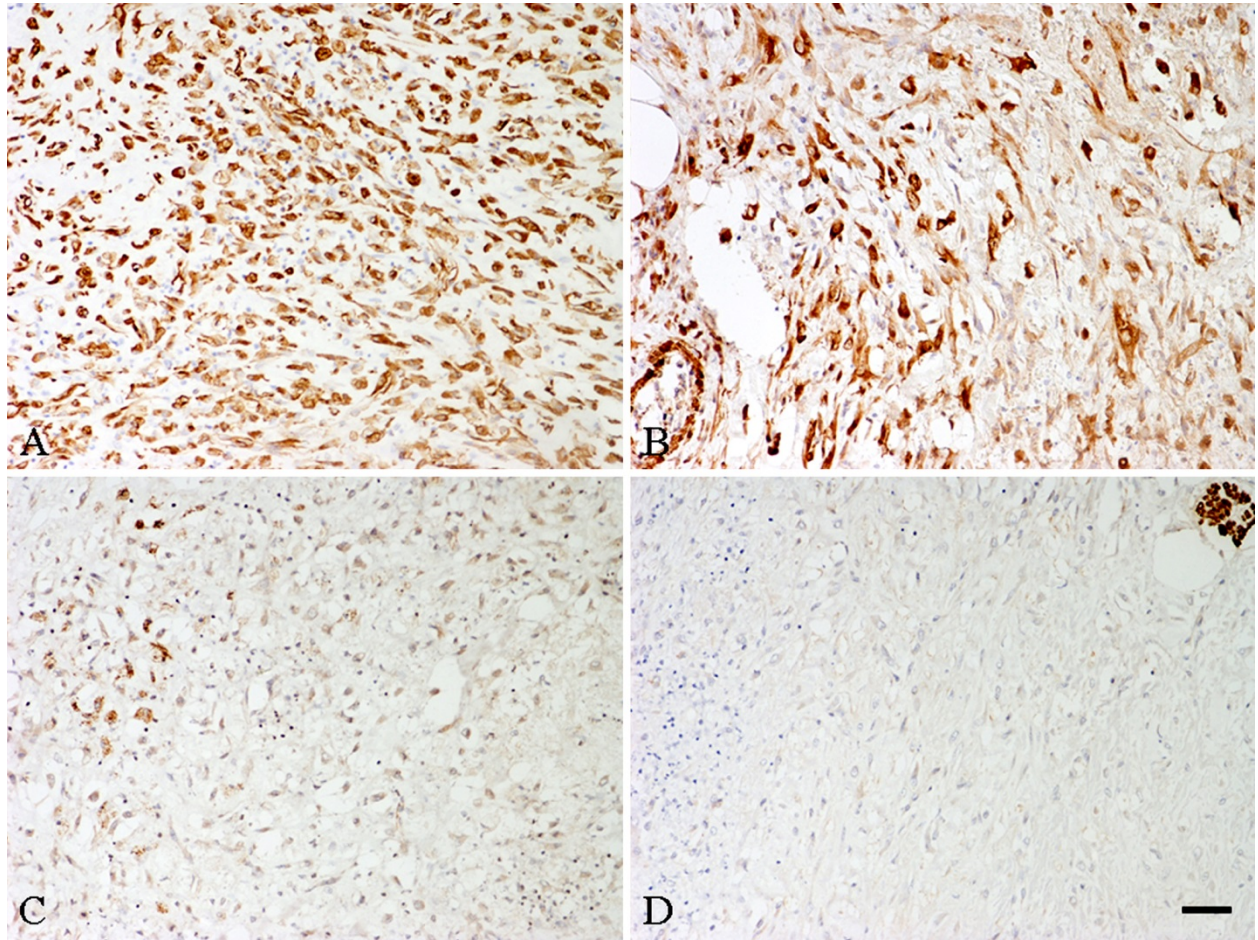

**Supplementary Figure 1.** Immunohistochemical features of an inflammatory myofibroblastic tumor of the canine pancreas. **A–C.** Intense and diffuse vimentin (**A**) and calponin (**B**) immunostaining, and focally distributed, moderate desmin (**C**) positivity of spindle cell population. **D.** Negative GFAP-immunostaining of spindle cells; a positive nerve fiber is visible in the upper right. IHC. Bar = 45  $\mu$ m.

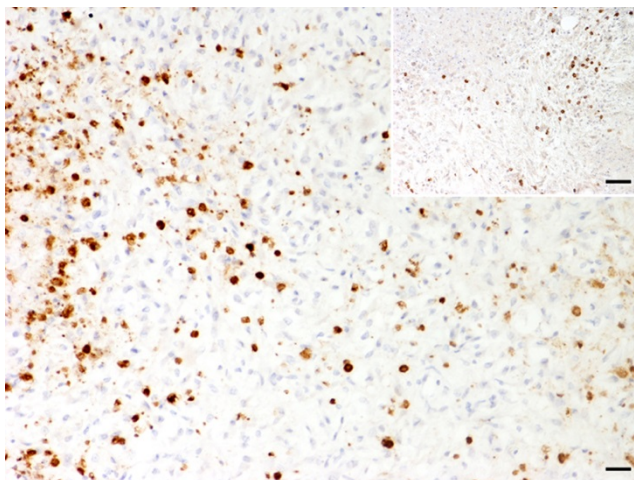

**Supplementary Figure 2.** Inflammatory myofibroblastic tumor of the canine pancreas with numerous MAC387-positive cells and CD3+ lymphocytes (inset) admixed with negative spindle cells. IHC. Bar = 22  $\mu$ m. Inset: bar = 60  $\mu$ m.

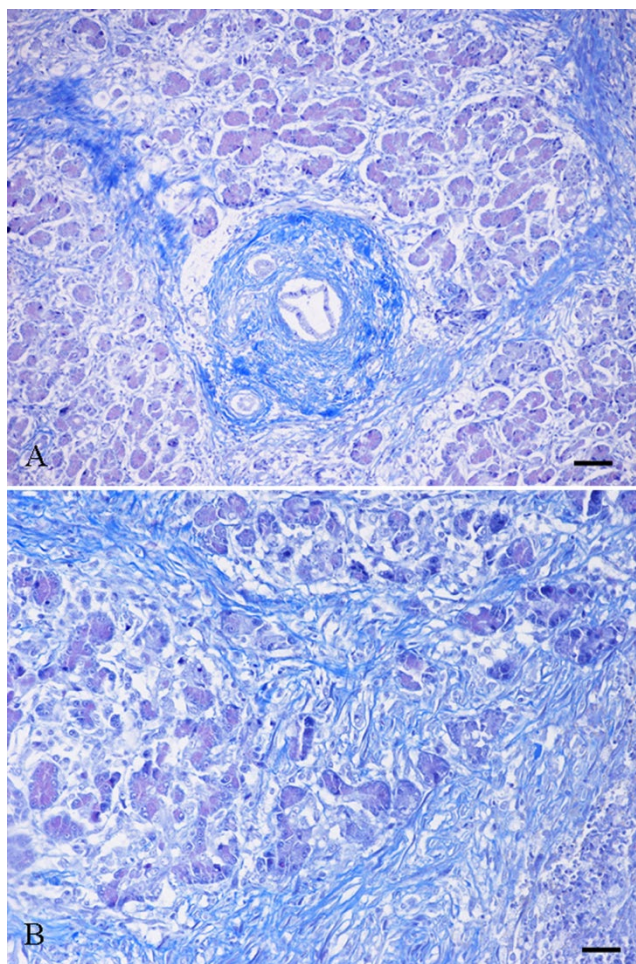

**Supplementary Figure 3.** Moderate-to-intense periductal and interstitial fibrosis of the adjacent pancreatic tissue. Masson trichrome. **A.** Bar = 70  $\mu\text{m}$ ; **B.** Bar = 35  $\mu\text{m}$ .
